# Supplementary material
Source: Research Square preprint supplement (doi:10.21203/rs.3.rs-10043027/v1)
Supplement: Supplementary file 1 [file 27229540593c17123136f140.pdf]

1 **Low functional antibodies to *P. falciparum* antigens in Beninese neonates further reduced**  
2 **the time to first malaria infection in infancy following placental malaria.**

3

4 Djelili Biauou<sup>1,2\*</sup>, Sébastien Dechavanne<sup>2,3</sup>, Ikhlaq Hussain Kana<sup>4,5</sup>, Aziz Bouraïma<sup>2</sup>, Ibrahim  
5 Sadissou<sup>2</sup>, André Garcia<sup>1</sup>, Florence Migot-Nabias<sup>1</sup>, Edmond J. Remarque<sup>6</sup>, Bart W Faber<sup>7</sup>,  
6 Sayeh Guemouri Jafari<sup>1</sup>, David Courtin<sup>8</sup>, Laure Gineau<sup>1</sup>, Achille Massougbodji<sup>9</sup>, Michael  
7 Theisen<sup>4,5</sup>, Felix Cheysson<sup>10</sup>, Célia Dechavanne<sup>1,2</sup>

8 <sup>1</sup>Université Paris Cité, IRD, Inserm, MERIT, F-75006 Paris, France.

9 <sup>2</sup>CERPAGE (Centre d'Etude et de Recherche sur les Pathologies Associées à la Grossesse et à  
10 l'Enfance), Cotonou, Bénin.

11 <sup>3</sup>MIVEGEC, University of Montpellier, IRD, CNRS, Montpellier, France.

12 <sup>4</sup>Centre for Translational Medicine and Parasitology, Department of Immunology and  
13 Microbiology, University of Copenhagen, Denmark.

14 <sup>5</sup>University of Copenhagen and Department for Congenital Disorders, Statens Serum Institute,  
15 Copenhagen, Denmark.

16 <sup>6</sup>Department of Virology, Biomedical Primate Research Centre, Rijswijk, Netherlands.

17 <sup>7</sup>Department of Parasitology, Biomedical Primate Research Centre, Rijswijk, Netherlands.

18 <sup>8</sup>UMR 177 INTERTRYP, IRD CIRAD and Université de Montpellier, France.

19 <sup>9</sup>Institut de Recherche Clinique du Bénin (IRCB), Cotonou, Bénin.

20 <sup>10</sup>LAMA (Laboratoire d'analyse et de mathématiques appliquées), CNRS UMR 8050,  
21 Université Gustave Eiffel, 77420 Champs-sur-Marne, France.

22

23  
24  
25  
26  
27  
28  
29  
30  
31  
32  
33  
34  
35  
36  
37  
38  
39  
40  
41  
42  
43  
44

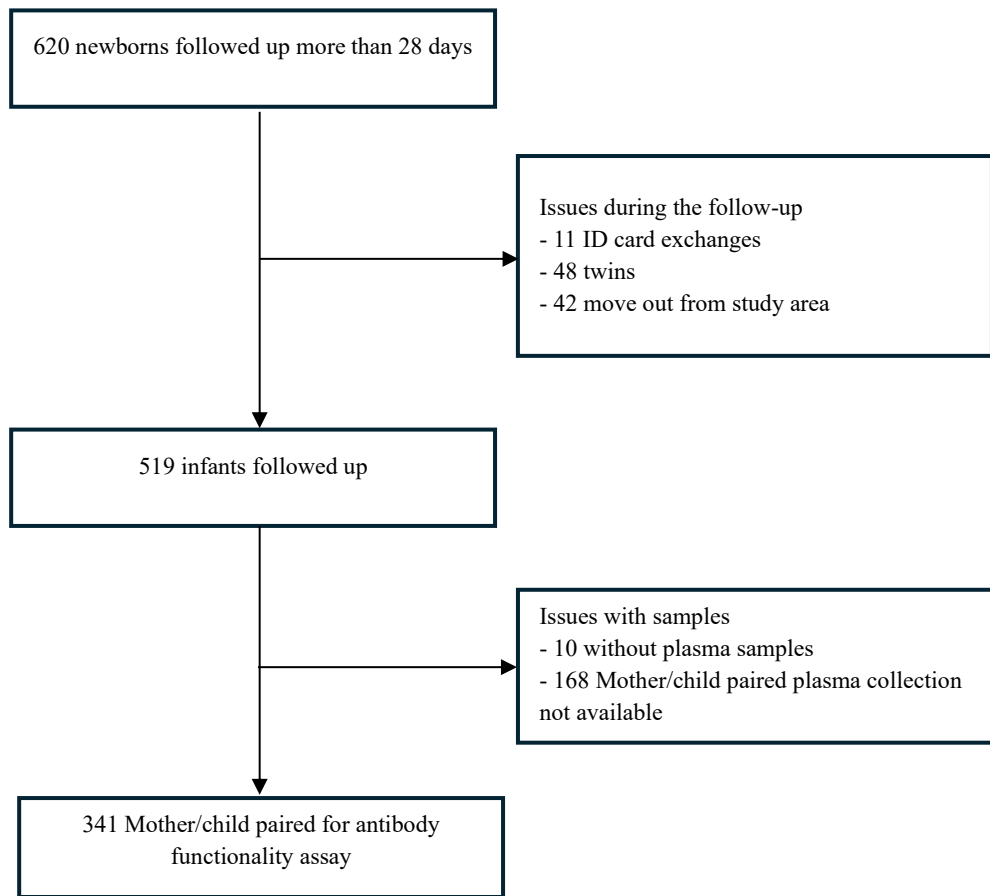

**Figure Supplementary 1: Study flow chart**

The Tori Bossito cohort is a birth cohort designed to evaluate malaria incidence and its determinants during early life. The follow-up includes 519 newborns until 18 months. The opsonic phagocytosis (BPA) was evaluated at birth for 341 mother/child paired plasma from available samples.

| Variables                       | n (%)      | No Placenta malaria<br>n=465<br>(%) [Conf. Int] | Placenta malaria<br>n=54<br>(%) [Conf. Int] | p-value                       |
|---------------------------------|------------|-------------------------------------------------|---------------------------------------------|-------------------------------|
| Hypergammaglobulinemia          |            |                                                 |                                             | 0,99 <sup>a</sup>             |
| <16 g.L-1                       | 358 (69,0) | 321 (61,8)                                      | 37 (7,1)                                    |                               |
| ≥16 g.L-1                       | 161 (31,0) | 144 (27,7)                                      | 17 (3,3)                                    |                               |
| Gestation                       |            |                                                 |                                             | <b>0,01<sup>a</sup></b>       |
| Primigravid                     | 441 (85,0) | 402 (77,5)                                      | 39 (7,5)                                    |                               |
| Multigravid                     | 78 (15,0)  | 63 (12,1)                                       | 15 (2,9)                                    |                               |
| Maternal parasite density (/μL) | 518        | 0,1 [0 ; 1,4]                                   | 781,2 [0 ; 3799,7]                          | <b>&lt;0,0001<sup>b</sup></b> |
| Mother's weight (kg)            | 521        | 61,8 [60,5 ; 63,1]                              | 57,9 [56,2 ; 59,8]                          | <b>0,0008<sup>b</sup></b>     |
| Mother's age (years)            | 525        | 27,8 [27,3 ; 28,3]                              | 25,6 [23,9 ; 27,2]                          | <b>0,01<sup>b</sup></b>       |
| Mousquito net                   |            |                                                 |                                             | 0,28 <sup>a</sup>             |
| No user                         | 182 (35,0) | 159 (87,4)                                      | 23 (12,6)                                   |                               |
| User                            | 337 (65,0) | 306 (90,8)                                      | 31 (09,2)                                   |                               |
| Sickle cell trait (SCT)         |            |                                                 |                                             | 0,26 <sup>a</sup>             |
| No SCT                          | 384 (78,2) | 347 (90,4)                                      | 37 (09,6)                                   |                               |
| SCT                             | 107 (21,8) | 92 (86,0)                                       | 15 (14,0)                                   |                               |
| Maternity                       |            |                                                 |                                             | 0,04 <sup>a</sup>             |
| Avame                           | 174 (33,5) | 164 (94,2)                                      | 10 (05,8)                                   |                               |
| Cada                            | 252 (48,5) | 219 (86,9)                                      | 33 (13,1)                                   |                               |
| Gare                            | 93 (18,0)  | 82 (88,2)                                       | 11 (11,8)                                   |                               |
| Birth weight (g)                |            |                                                 |                                             | 0,21 <sup>a</sup>             |
| < 2500                          | 48 (9,2)   | 40 (7,7)                                        | 8 (1,5)                                     |                               |
| ≥2500                           | 471 (90,8) | 425 (81,9)                                      | 46 (8,9)                                    |                               |
| Prematurity                     |            |                                                 |                                             | 0,75 <sup>a</sup>             |
| No Prema                        | 469 (90,4) | 416 (80,2)                                      | 47 (9,1)                                    |                               |
| Prema                           | 56 (10,8)  | 49 (9,4)                                        | 7 (1,3)                                     |                               |
| IPTp                            |            |                                                 |                                             | 0,99 <sup>a</sup>             |
| Not treated                     | 64 (12,3)  | 77 (14,8)                                       | 9 (1,7)                                     |                               |
| At least one dose               | 277 (53,4) | 388 (74,8)                                      | 45 (8,7)                                    |                               |

45

#### 46 **Supplementary table 1: Population characteristics of the Tori Bossito cohort**

47 Conf. Int: 95% confidence intervale, n: number of participants, %, a: x2 test, b: Student's t-test,  
48 SCT: Sickle cell trait, IPTp: Intermittent preventive antimalarial treatments, g.L-1: gram per  
49 liter (IgG quantity), p/μL: parasites per microliter; kg: kilogram (mother weight), g: gram  
50 (weight of newborn at birth), Prematurity was defined as birth less or equal to 37 SA (using  
51 Balard score).

52

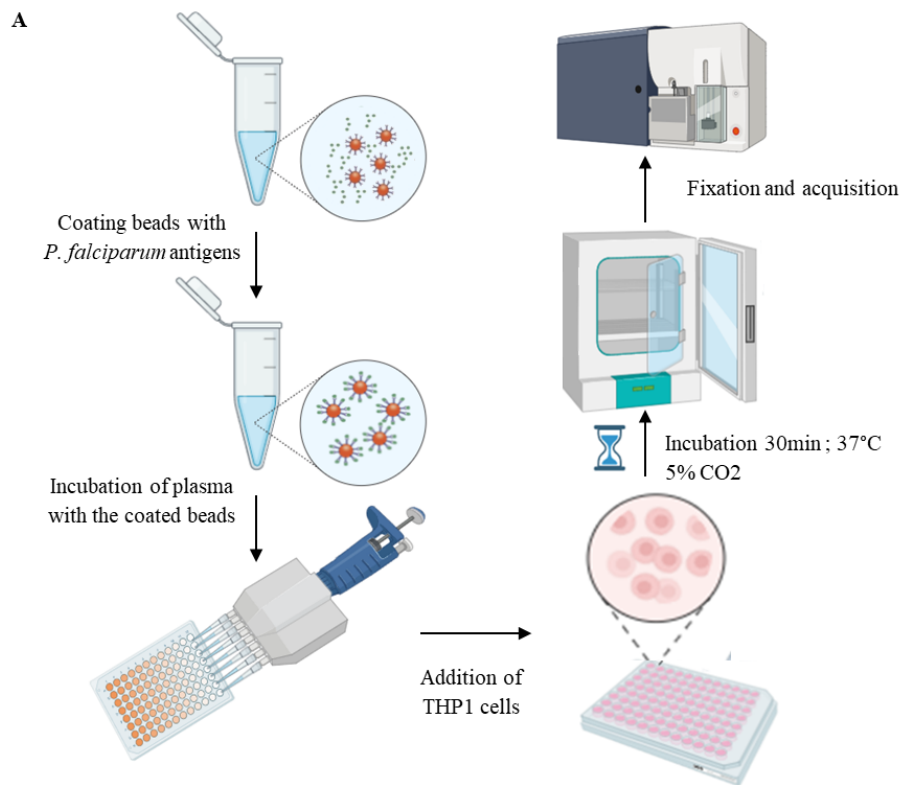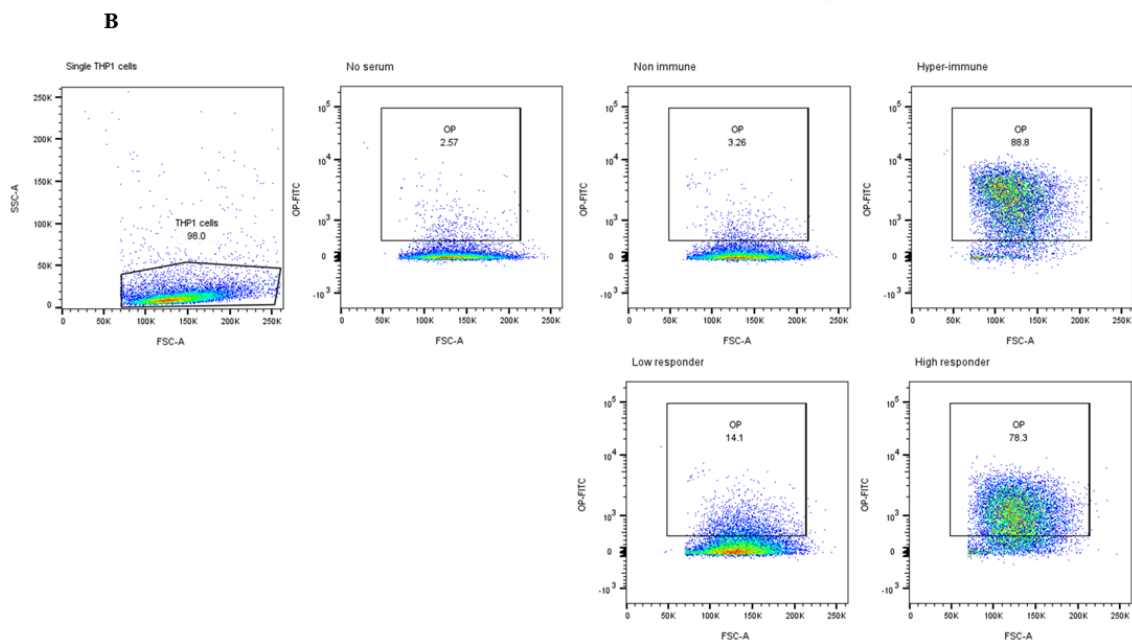

53

54 **Supplementary Figure 2: Beads-based opsonic phagocytosis assay ang gating strategy**

55 Bead-based opsonic phagocytosis (BPA) assay: **(A)** The BPA procedure includes the following steps: i)  
 56 coupling beads with antigens, ii) incubating the antigen-coated beads with plasma, iii) incubating with  
 57 THP-1 cells, and iv) analysis by flow cytometry. **(B)** Gating strategy showing the BPA percentage of the  
 58 controls included in the assay, after gating on single cells.

| Maternal BPA        | no PM       |                      |         |                 | PM                   |         |        |                 |
|---------------------|-------------|----------------------|---------|-----------------|----------------------|---------|--------|-----------------|
|                     | Coefficient | [95% conf. interval] | p.value | Coefficient     | [95% conf. interval] | p.value |        |                 |
| Maternal IgG (log)  | 4,806       | 3,892                | 5,72    | < <b>0,0001</b> | 3,331                | 0,939   | 5,722  | <b>0,0072</b>   |
| Antigens (ref AMA1) |             |                      |         |                 |                      |         |        |                 |
| MSP3                | 21,973      | 16,819               | 27,126  | < <b>0,0001</b> | 22,365               | 8,263   | 36,468 | <b>0,0023</b>   |
| GLURP-R0            | 20,022      | 14,591               | 25,454  | < <b>0,0001</b> | 10,434               | -4,138  | 25,007 | 0,1627          |
| GLURP-R2            | 43,004      | 38,819               | 47,19   | < <b>0,0001</b> | 36,801               | 25,543  | 48,059 | < <b>0,0001</b> |
| Primigest           | -5,007      | -9,735               | -0,28   | <b>0,0388</b>   | -0,799               | -10,056 | 8,459  | 0,8667          |
| Sickle cell trait   | 0,502       | -3,619               | 4,622   | 0,8116          | 5,541                | -3,489  | 14,571 | 0,2366          |
| Maternal weight     | -0,087      | -0,193               | 0,02    | 0,1113          | -0,498               | -1,161  | 0,166  | 0,1502          |
| Maternal IgG1 (log) | 2,394       | 1,695                | 3,093   | < <b>0,0001</b> | 1,3                  | -0,656  | 3,257  | 0,1953          |
| Antigens (ref AMA1) |             |                      |         |                 |                      |         |        |                 |
| MSP3                | 13,681      | 8,807                | 18,555  | < <b>0,0001</b> | 14,107               | 0,203   | 28,012 | <b>0,0488</b>   |
| GLURP-R0            | 8,997       | 4,177                | 13,818  | <b>0,0003</b>   | 0,945                | -12,657 | 14,548 | 0,8918          |
| GLURP-R2            | 39,146      | 34,754               | 43,537  | < <b>0,0001</b> | 32,8                 | 20,371  | 45,228 | < <b>0,0001</b> |
| Primigest           | -4,354      | -9,535               | 0,826   | 0,1006          | -0,808               | -10,983 | 9,367  | 0,877           |
| Sickle cell trait   | 0,035       | -4,402               | 4,473   | 0,9876          | 6,509                | -3,01   | 16,027 | 0,1886          |
| Maternal weight     | -0,084      | -0,197               | 0,029   | 0,1459          | -0,534               | -1,238  | 0,169  | 0,1454          |
| Maternal IgG3 (log) | 3,09        | 2,502                | 3,677   | < <b>0,0001</b> | 1,979                | 0,207   | 3,752  | <b>0,0303</b>   |
| Antigens (ref AMA1) |             |                      |         |                 |                      |         |        |                 |
| MSP3                | 3,103       | -0,236               | 6,443   | 0,0689          | 11,871               | 2,098   | 21,645 | <b>0,019</b>    |
| GLURP-R0            | 1,759       | -1,727               | 5,245   | 0,3231          | -1,755               | -11,888 | 8,379  | 0,735           |
| GLURP-R2            | 26,444      | 23,073               | 29,815  | < <b>0,0001</b> | 27,394               | 18,112  | 36,676 | < <b>0,0001</b> |
| Primigest           | -3,522      | -8,341               | 1,298   | 0,1533          | -1,23                | -10,481 | 8,02   | 0,7959          |
| Sickle cell trait   | 0,43        | -3,776               | 4,637   | 0,8412          | 7,702                | -1,453  | 16,857 | 0,1077          |
| Maternal weight     | -0,045      | -0,152               | 0,062   | 0,4102          | -0,444               | -1,13   | 0,243  | 0,2131          |

59

## 60 **Supplementary table 2: Association between PM and the functional maternal IgG, IgG1** 61 **and IgG3 specific for malaria antigens**

62 All six stratified linear mixed-effects models converged successfully. Robust standard errors  
63 were used to account for mild heteroscedasticity, confirmed by the Breusch-Pagan test for the  
64 IgG model ( $F = 5.28$ ,  $p = 0.022$ ,  $R^2 = 0.004$ ). Residual distributions were approximately  
65 symmetric and centered on zero across all models. All six models were considered valid for  
66 inference, with residual heteroscedasticity and non-Gaussian random effects acknowledged as  
67 consistent limitations.

| Fetal BPA            | no PM       |                      |         |             | PM                   |         |        |         |
|----------------------|-------------|----------------------|---------|-------------|----------------------|---------|--------|---------|
|                      | Coefficient | [95% conf. interval] | p.value | Coefficient | [95% conf. interval] | p.value |        |         |
| Fetal IgG (log)      | 3,041       | 2,42                 | 3,663   | <0,0001     | 5,428                | 3,78    | 7,076  | <0,0001 |
| Antigens (ref AMA1)  |             |                      |         |             |                      |         |        |         |
| MSP3                 | 9,707       | 6,124                | 13,29   | <0,0001     | 18,931               | 9,214   | 28,648 | <0,0001 |
| GLURP-R0             | 0,127       | -3,674               | 3,927   | 0,948       | 8,464                | -1,606  | 18,534 | 0,102   |
| GLURP-R2             | 7,381       | 4,047                | 10,714  | <0,0001     | 12,614               | 4,011   | 21,217 | 0,005   |
| Maternal BPA         | 0,861       | 0,823                | 0,898   | <0,0001     | 0,828                | 0,727   | 0,928  | <0,0001 |
| Hypergammaglobulinen | 1,826       | -0,229               | 3,881   | 0,083       | -5,925               | -11,209 | -0,641 | 0,0349  |
| Primigravidae        | 0,722       | -2,069               | 3,513   | 0,613       | 3,241                | -2,355  | 8,837  | 0,265   |
| Sickle cell trait    | -1,29       | -3,714               | 1,133   | 0,298       | 2,649                | -3,078  | 8,376  | 0,371   |
| Maternal weight      | 0,05        | -0,013               | 0,113   | 0,118       | -0,252               | -0,658  | 0,155  | 0,234   |
| Fetal IgG1 (log)     | 1,361       | 0,906                | 1,816   | <0,0001     | 3,4                  | 1,942   | 4,858  | <0,0001 |
| Antigens (ref AMA1)  |             |                      |         |             |                      |         |        |         |
| MSP3                 | 2,447       | -0,706               | 5,599   | 0,129       | 11,334               | 1,667   | 21,001 | 0,023   |
| GLURP-R0             | -8,178      | -11,39               | -4,966  | <0,0001     | -0,664               | -10,343 | 9,016  | 0,893   |
| GLURP-R2             | 2,435       | -0,84                | 5,71    | 0,145       | 8,705                | -0,499  | 17,909 | 0,066   |
| Maternal BPA         | 0,892       | 0,855                | 0,93    | <0,0001     | 0,877                | 0,772   | 0,981  | <0,0001 |
| Hypergammaglobulinen | 2,134       | -0,061               | 4,329   | 0,058       | -4,764               | -11,014 | 1,485  | 0,144   |
| Primigravidae        | 0,768       | -2,243               | 3,779   | 0,617       | 3,681                | -3,087  | 10,449 | 0,293   |
| Sickle cell trait    | -1,791      | -4,373               | 0,791   | 0,175       | 4,285                | -2,49   | 11,06  | 0,223   |
| Maternal weight      | 0,055       | -0,012               | 0,121   | 0,108       | -0,283               | -0,768  | 0,201  | 0,260   |
| Fetal IgG3 (log)     | 1,368       | 0,979                | 1,756   | <0,0001     | 1,847                | 0,562   | 3,132  | 0,006   |
| Antigens (ref AMA1)  |             |                      |         |             |                      |         |        |         |
| MSP3                 | -2,812      | -4,955               | -0,668  | 0,010       | -3,391               | -9,996  | 3,215  | 0,317   |
| GLURP-R0             | -12,264     | -14,534              | -9,995  | <0,0001     | -14,265              | -21,158 | -7,373 | <0,0001 |
| GLURP-R2             | -3,532      | -5,903               | -1,16   | 0,004       | -5,643               | -12,471 | 1,185  | 0,108   |
| Maternal BPA         | 0,876       | 0,838                | 0,914   | <0,0001     | 0,855                | 0,744   | 0,966  | <0,0001 |
| Hypergammaglobulinen | 2,671       | 0,447                | 4,895   | 0,019       | -3,417               | -9,717  | 2,883  | 0,295   |
| Primigravidae        | 1,388       | -1,638               | 4,413   | 0,370       | 2,061                | -4,764  | 8,886  | 0,558   |
| Sickle cell trait    | -1,52       | -4,145               | 1,106   | 0,258       | 4,216                | -2,676  | 11,108 | 0,239   |
| Maternal weight      | 0,062       | -0,005               | 0,129   | 0,073       | -0,172               | -0,665  | 0,321  | 0,498   |

68

69 **Supplementary table 3: Association between PM and the functional transmitted (fetal)**  
70 **IgG, IgG1 and IgG3 specific for malaria antigens**

71 All six linear mixed-effects models showed good fit (IgG, IgG1, and IgG3, stratified by  
72 group). ICC values were low to moderate (0.091–0.195), justifying the use of random  
73 intercepts. Residuals were randomly scattered around zero with no systematic trend,  
74 supporting homoscedasticity and linearity. Residual distributions were approximately normal  
75 and zero-centered. VIF values were low for all predictors ( $VIF \leq 5.19$ ), indicating no  
76 problematic multicollinearity.

| CMTR functional IgG Variables | Coefficient         | [95% conf. | interval] | p.value |                   |
|-------------------------------|---------------------|------------|-----------|---------|-------------------|
| IgG                           | Maternal_IgG        | 0,037      | 0,017     | 0,057   | <b>&lt;0,0001</b> |
|                               | PM                  | -0,215     | -0,371    | -0,059  | <b>0,007</b>      |
|                               | Maternal_IgGxPM     | 0,045      | 0,018     | 0,071   | <b>0,001</b>      |
|                               | Antigens (ref AMA1) |            |           |         |                   |
|                               | MSP3                | 0,042      | -0,052    | 0,135   | 0,383             |
|                               | GLURP-R0            | -0,204     | -0,301    | -0,108  | <b>&lt;0,0001</b> |
|                               | GLURP-R2            | -0,106     | -0,173    | -0,039  | <b>0,002</b>      |
|                               | Primigest           | 0,028      | -0,039    | 0,095   | 0,419             |
|                               | Maternal weight     | 0,002      | 0,000     | 0,004   | 0,128             |
|                               | Sickle cell trait   | -0,002     | -0,063    | 0,059   | 0,954             |
| IgG1                          | Maternal_IgG        | 0,024      | 0,011     | 0,036   | <b>&lt;0,0001</b> |
|                               | PM                  | -0,133     | -0,240    | -0,026  | <b>0,015</b>      |
|                               | Maternal_IgGxPM     | 0,033      | 0,014     | 0,053   | <b>0,001</b>      |
|                               | Antigens (ref AMA1) |            |           |         |                   |
|                               | MSP3                | 0,000      | -0,073    | 0,072   | 0,996             |
|                               | GLURP-R0            | -0,268     | -0,367    | -0,170  | <b>&lt;0,0001</b> |
|                               | GLURP-R2            | -0,112     | -0,174    | -0,050  | <b>&lt;0,0001</b> |
|                               | Primigest           | 0,020      | -0,051    | 0,091   | 0,577             |
|                               | Maternal weight     | 0,002      | 0,000     | 0,004   | 0,083             |
|                               | Sickle cell trait   | 0,000      | -0,062    | 0,063   | 0,992             |
| IgG3                          | Maternal_IgG        | 0,012      | 0,001     | 0,023   | <b>0,030</b>      |
|                               | PM                  | -0,044     | -0,140    | 0,051   | 0,361             |
|                               | Maternal_IgGxPM     | 0,032      | 0,008     | 0,057   | <b>0,010</b>      |
|                               | Antigens (ref AMA1) |            |           |         |                   |
|                               | MSP3                | -0,130     | -0,178    | -0,082  | <b>&lt;0,0001</b> |
|                               | GLURP-R0            | -0,376     | -0,451    | -0,301  | <b>&lt;0,0001</b> |
|                               | GLURP-R2            | -0,236     | -0,282    | -0,190  | <b>&lt;0,0001</b> |
|                               | Primigest           | 0,023      | -0,048    | 0,095   | 0,522             |
|                               | Maternal weight     | 0,002      | 0,000     | 0,004   | 0,068             |
|                               | Sickle cell trait   | -0,001     | -0,065    | 0,064   | 0,984             |

77

78 **Supplementary table 4: Association between the cord-to-mother transfer ratio (CMTR)**  
79 **of functional IgG, IgG1 and IgG3 with PM**

80 Graphical diagnostics showed Pearson residuals approximately symmetrically distributed  
81 around zero, with Q-Q plots confirming near-normality. Residuals across quartiles of fitted  
82 values showed stable medians and homogeneous spread, with modest heteroscedasticity in the  
83 highest quartile, typical of gamma models. Random effects followed a normal distribution  
84 centered at zero. The Breusch-Pagan test confirmed residual heteroscedasticity ( $p < 0.001$  for  
85 IgG and IgG1), addressed by the robust variance estimator. Overall, these diagnostics support  
86 the adequacy of the modelling approach.

**Cox proportional hazards model with time-varying coefficients**

| Variables                           | HR    | Std. Err. | z      | P>z               | [95% conf. interval] |
|-------------------------------------|-------|-----------|--------|-------------------|----------------------|
| <b>Fetal IgG levels</b>             |       |           |        |                   |                      |
| PM                                  | 1,660 | 0,368     | 2,290  | <b>0,022</b>      | 1,075 – 2,563        |
| Hypergamma ( $\geq 16\text{g/dL}$ ) | 1,703 | 0,275     | 3,290  | <b>0,001</b>      | 1,240 – 2,338        |
| Environm. expo.                     | 1,101 | 0,014     | 7,330  | <b>&lt;0,0001</b> | 1,073 – 1,129        |
| High IgG levels (fixed)             | 0,000 | 0,000     | -3,300 | <b>0,001</b>      | 0,000 – 0,012        |
| High IgG levels (Time-varying)      | 5,513 | 3,271     | 2,880  | <b>0,004</b>      | 1,723 – 17,640       |

|                                     |       |       |        |                   |               |
|-------------------------------------|-------|-------|--------|-------------------|---------------|
| <b>Fetal IgG BPA</b>                |       |       |        |                   |               |
| PM                                  | 1,624 | 0,360 | 2,190  | <b>0,029</b>      | 1,051 – 2,508 |
| Hypergamma ( $\geq 16\text{g/dL}$ ) | 1,486 | 0,239 | 2,460  | <b>0,014</b>      | 1,084 – 2,037 |
| Environm. expo.                     | 1,101 | 0,015 | 7,270  | <b>&lt;0,0001</b> | 1,073 – 1,129 |
| High IgG BPA (fixed)                | 0,003 | 0,006 | -2,940 | <b>0,003</b>      | 0,000 – 0,147 |
| High IgG BPA (Time-varying)         | 2,685 | 0,980 | 2,710  | <b>0,007</b>      | 1,313 – 5,491 |

**Time-varying hazard ratios BPA breadthscore or IgG breadthscore**

| Time (days) | BPA   |                 |                  | IgG levels |                 |                  |
|-------------|-------|-----------------|------------------|------------|-----------------|------------------|
|             | HR    | IC 95%          | p                | HR         | IC 95%          | p                |
| 30          | 0.092 | [0.022 – 0.378] | <b>0.001</b>     | 0.002      | [0.000 – 0.034] | <b>&lt;0.001</b> |
| 100         | 0.301 | [0.164 – 0.554] | <b>&lt;0.001</b> | 0.032      | [0.009 – 0.112] | <b>&lt;0.001</b> |
| 200         | 0.597 | [0.435 – 0.821] | <b>0.002</b>     | 0.147      | [0.087 – 0.247] | <b>&lt;0.001</b> |
| 300         | 0.892 | [0.589 – 1.350] | 0.588            | 0.360      | [0.231 – 0.561] | <b>&lt;0.001</b> |
| 365         | 1.082 | [0.646 – 1.813] | 0.764            | 0.556      | [0.308 – 1.003] | 0.051            |

87

**88 Supplementary table 5: Levels or functional fetal IgG in protection from malaria in infancy**

89 A Cox proportional hazards model was fitted with four covariates and IgG breadth score  
90 dichotomized at the median. Multicollinearity was ruled out (mean VIF = 1.00). Following an  
91 initial Schoenfeld test, a time-varying coefficient was introduced by splitting follow-up time  
92 and adding an interaction term IgG breadth score  $\times \ln(t)$ . The logarithmic transformation  $\ln(t)$   
93 was chosen to model the time-varying effect of IgG breadth score, as it captures a progressive  
94 attenuation of protection over time, consistent with both the biological expectation of maternal  
95 antibody waning and the observed pattern of hazard ratios across follow-up. This fully resolved  
96 the non-proportionality issue (global Schoenfeld test  $p = 0.394$ ). The hazard ratio for IgG  
97 breadth score reached statistical significance from day 200 (HR = 0.15,  $p < 0.001$ ) to day 300  
98 (HR = 0.36,  $p < 0.001$ ), with a borderline estimate at day 365 (HR = 0.56,  $p = 0.051$ ). Residual  
99 diagnostics supported adequate model fit

|                              | Hazard Ratio | Std. Err. | z      | P> z              | [95% conf. | interval] |
|------------------------------|--------------|-----------|--------|-------------------|------------|-----------|
| Fixed effect                 |              |           |        |                   |            |           |
| IgG levels                   | 0,022        | 0,014     | -5,880 | <b>&lt;0,0001</b> | 0,006      | 0,079     |
| BPA                          | 0,271        | 0,091     | -3,870 | <b>&lt;0,0001</b> | 0,140      | 0,525     |
| PM                           | 2,138        | 0,581     | 2,790  | <b>0,005</b>      | 1,255      | 3,643     |
| BPA x PM                     | 0,433        | 0,212     | -1,710 | 0,088             | 0,166      | 1,132     |
| Hypergamma ( $\geq 16$ g/dL) | 1,815        | 0,297     | 3,640  | <b>&lt;0,0001</b> | 1,316      | 2,503     |
| Environm. expo.              | 1,519        | 0,095     | 6,710  | <b>&lt;0,0001</b> | 1,344      | 1,716     |
| Time-Varying Covariate       |              |           |        |                   |            |           |
| IgG levels                   | 0,988        | 0,003     | -4,120 | <b>&lt;0,0001</b> | 0,982      | 0,994     |
| IgG BPA                      | 1,008        | 0,002     | 4,290  | <b>&lt;0,0001</b> | 1,004      | 1,012     |

101

102 **Supplementary table 6: Levels or functional fetal IgG in protection from malaria in**  
103 **infancy**

104 The proportional hazards assumption was assessed using Schoenfeld residuals; IgG levels and  
105 IgG function violated this assumption and were modeled as time-varying covariates. A  
106 significant interaction between IgG function and disease status was retained in the final model  
107 ( $\chi^2(1) = 4.65$ ,  $p = 0.031$ ). Multicollinearity was negligible (mean VIF = 1.57). No major outliers  
108 were detected (all deviance residuals within  $\pm 3$ ), and removal of one potentially influential  
109 observation did not substantially alter model estimates. Cox-Snell residuals confirmed adequate  
110 overall goodness-of-fit.

111
